# Supplementary material for: Wintertime carbon uptake of managed temperate grassland ecosystems may influence grassland dynamics
Source: Copernicus journal article supplement (doi:10.5194/bg-2019-305), 2019-09-04
Supplement: Supplementary file [file bg-2019-305-AC1-supplement.zip]

Supplement

Description of newly modeled processes

SOLVEG is a one-dimensional multi-layer model that consists of four sub-models for the atmosphere near the surface, soil, vegetation, and radiation within the vegetation canopy (Fig. S1). Since full descriptions of the model are available in the papers by Nagai (2004), Katata (2009), Ota et al. (2013), and Katata and Ota (2017), we give details about cold processes newly modelled in the present study.

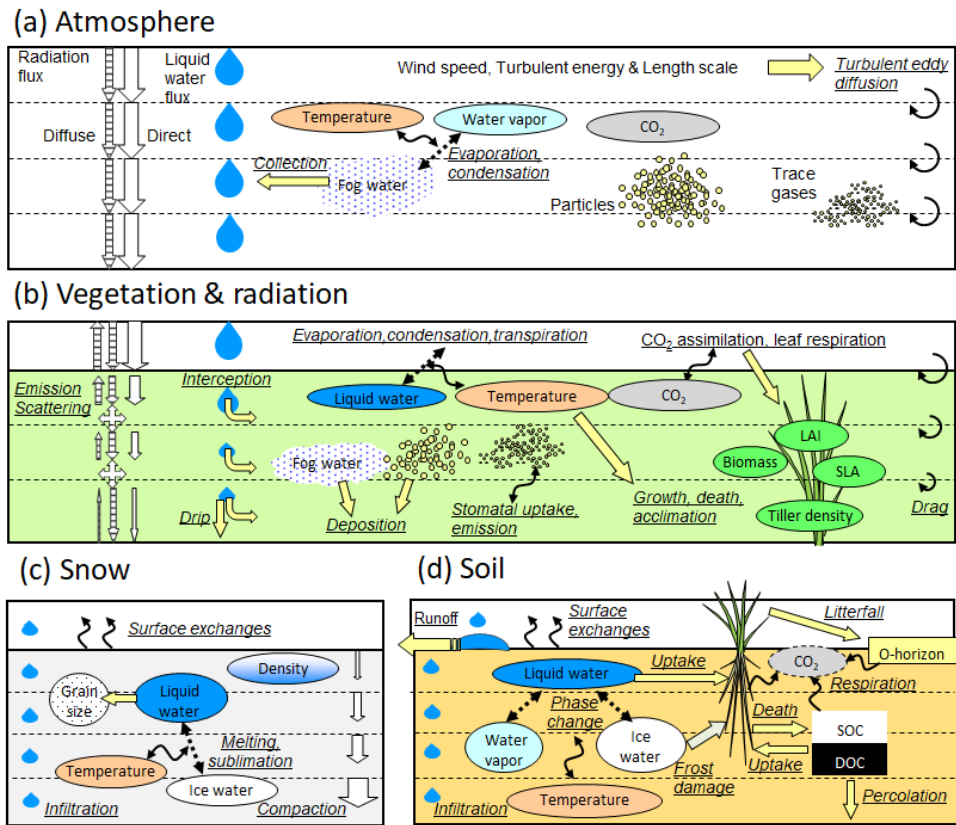

Fig. S1 Overview of key processes (underlined words) and variables for (a) atmosphere, (b) vegetation, radiation, (c) snow, and (d) soil submodels in SOLVEG. The part of the existing grass growth model of BASGRA is coupled in this study.

## Modeling snow accumulation and melting processes

A multi-layer snow module is newly incorporated into the SOLVEG model. Most of the variables in the following equations are based on either the Community Land Model (CLM: Oleson *et al.*, 2010) or SNTHERM (Jordan 1991), while the model is unique in including the gravitational and capillary liquid water flows in unsaturated snow layer based on van Genuchten's concept of water flow in the unsaturated zone (c.f., Hirashima, Yamaguchi, Sati, & Lehning, 2010).

The temporal change in snow temperature  $T_{sn}$  (K) is expressed by the heat conduction equation based on Yamazaki (2001) as

$$C_{sn}\rho_{sn}\frac{\partial T_{sn}}{\partial t} = \frac{\partial}{\partial z}\left(\lambda_{sn}\frac{\partial T_{sn}}{\partial z}\right) - \frac{\partial I_n}{\partial z} - l_f E_{smel} - lE_{sb}, \quad (1)$$

where  $C_{sn}$  and  $\rho_{sn}$  are the specific heat of snow ( $\text{J kg}^{-1} \text{K}^{-1}$ ) and the density of the bulk snow ( $\text{kg m}^{-3}$ ), respectively,  $\lambda_{sn}$  is the thermal conductivity of snow ( $\text{W m}^{-1} \text{K}^{-1}$ ),  $I_n$  is the net solar flux in the snow layer ( $\text{W m}^{-2}$ ),  $l_f$  and  $l$  are the latent heats of fusion and sublimation ( $\text{J kg}^{-1}$ ), respectively, and  $E_{smel}$  is the melting or freezing rate in the snow layer ( $\text{kg m}^{-3} \text{s}^{-1}$ ), and  $E_{sb}$  is the sublimation rate of water vapor from the snow layer ( $\text{kg m}^{-3} \text{s}^{-1}$ ).  $I_n$  is calculated as:

$$(1 - r)(1 - A_b)S_{down} \exp(-\mu z), \quad (2)$$

where  $r$  is the absorptivity of solar radiation at the snow surface,  $A_b$  is the albedo of the snow surface as a sum of the direct and the diffuse visible and near-infrared solar and long-wave radiations (Wiscombe & Warren, 1980), and  $\mu$  is the extinction coefficient of the solar radiation in the snow layer (Jordan, 1991).

The sublimation rate  $E_{sb}$  is calculated only at the snow surface by assuming that water vapor is saturated over the snow as:

$$E_{sb0} = \sigma_{sn} \rho c_{E0} |u| [q_{sat}(T_{sn0}) - q_r], \quad (3)$$

where  $\sigma_{sn}$  is the fractional area of snow cover parameterized using physical snow height (Essery, Morin, Lejeune, & Menard, 2013),  $\rho$  is the density of air ( $\text{kg m}^{-3}$ ),  $c_{E0}$  is the bulk coefficient,  $q_{sat}(T_{sn0})$  is the saturated specific humidity ( $\text{kg kg}^{-1}$ ) at the snow surface temperature  $T_{sn0}$  (K), and  $|u|$  and  $q_r$  are the horizontal wind speed ( $\text{m s}^{-1}$ ) and specific humidity ( $\text{kg kg}^{-1}$ ) at the lowest atmospheric layer, respectively.

Melting or freezing rate in the snow layer is calculated from snow temperature as:

$$E_{smel} = \frac{c_{sn} \rho_{sn}}{l_f} \frac{T_{sn} - T_m}{\partial t}, \quad (4)$$

where  $T_m$  is the melting point of 273.15 K. Using  $E_{smel}$ , the ice content in snow  $w_i$  ( $\text{kg m}^{-2}$ ) at each snow layer is determined as:

$$\frac{\partial w_i}{\partial t} = -E_{smel} \Delta z, \quad (5)$$

where  $\Delta z$  is the snow layer thickness (m).

The mass balance equation for liquid water in the snow layer is given as:

$$\rho_w \frac{\partial \eta_{sw}}{\partial t} = \frac{\partial}{\partial z} \left( D_{sw} \frac{\partial \eta_{sw}}{\partial z} + K_{sw} \right) - E_{smel}, \quad (6)$$

where  $\eta_{sw}$  is the volumetric liquid water content ( $\text{m}^3 \text{m}^{-3}$ ),  $D_{sw}$  is the liquid water diffusivity ( $\text{m}^2 \text{s}^{-1}$ ),  $K_{sw}$  is the snow unsaturated hydraulic conductivity ( $\text{m s}^{-1}$ ), and  $\rho_w$  is the density of liquid water ( $\text{kg m}^{-3}$ ) in the snow layer. The equations for  $D_{sw}$  and  $K_{sw}$  are similar to those for soil

water content in the capillary region (Katata 2009), except for using the empirical parameters for the snow cover that are given by Hirashima *et al.* (2010).

Snow accumulation and compaction at each snow layer are modelled as:

$$\frac{1}{\Delta z} \frac{\partial \Delta z}{\partial t} = C_{snf} - C_{met} - C_{over} - C_{mel}, \quad (7)$$

$$C_{met} = c_1 \exp[-c_2(T_m - T_s) - c_3 \max(0, \rho_s - \rho_0)], \quad (8)$$

$$C_{over} = \frac{-P_s}{\eta_{sn}}, \quad (9)$$

$$C_{mel} = -\frac{1}{\Delta t} \max\left(0, \frac{f_{ice} - f_{ice}^+}{f_{ice}}\right), \quad (10)$$

where  $C_{snf}$ ,  $C_{met}$ ,  $C_{over}$ , and  $C_{mel}$  are the change rates in  $\Delta z$  ( $s^{-1}$ ) due to snowfall, metamorphism, overburden, and melting, respectively, and  $f_{ice}$  and  $f_{ice}^+$  the fractions of ice before and after the melting, respectively.  $C_{snf}$  is calculated as  $S_f \rho_{fs} / \rho_w$ , where  $S_f$  is the snowfall rate ( $mm\ s^{-1}$ ) given by either the input data or the empirical equation using total rainfall rate and wet bulb temperature (Yamazaki 2001), and  $\rho_{fs}$  the fresh snow density ( $kg\ m^{-3}$ ) obtained by Boone (2002). Values for the parameters in the above equations are given by Oleson *et al.* (2010).

Snow grain growth (i.e., change in grain size in the snow layer) is calculated based on Jordan (1991) as:

$$\frac{\partial d_{sn}}{\partial t} = \begin{cases} \frac{g_1 |U_v|}{d_{sn}} & \eta_{sw} = \eta_{swilt} \\ \frac{g_2}{d_{sn}} (\eta_{sw} + 0.05) & \eta_{swilt} < \eta_{sw} < 0.09, \\ 0.14 \frac{g_2}{d_{sn}} & 0.09 < \eta_{sw} \end{cases} \quad (11)$$

where  $d_{sn}$  is the snow grain diameter (m),  $U_v$  the mass vapor flux in the snow layer ( $kg\ m^{-2}\ s^{-1}$ ),

and  $g_1$  and  $g_2$  the parameters. The formulation of  $U_v$  and the values of  $g_1$  and  $g_2$  are given by Jordan (1991).

After the above calculations for temperature, liquid and ice water contents, and accumulation and compaction in snow, the number of snow layers is adjusted by either combining or subdividing layers (Jordan, 1991) to obtain the physical snow height.

73

#### 74 *Modeling freeze-thaw process in soil*

In the soil module, freeze-thaw processes in soil are considered based on heat conduction and liquid water flow equations as follows:

$$77 \quad C_s \rho_s \frac{\partial T_s}{\partial t} = \frac{\partial}{\partial z} \left( \lambda_s \frac{\partial T_s}{\partial z} \right) - l E_b - l_f E_{mel}, \quad (12)$$

$$78 \quad \rho_w \frac{\partial \eta_w}{\partial t} = \frac{\partial}{\partial z} \left( D_w \frac{\partial \eta_w}{\partial z} + K \right) - E_b - E_{mel}, \quad (13)$$

where  $C_s$  and  $\rho_s$  are the specific heat of soil ( $\text{J kg}^{-1} \text{K}^{-1}$ ) and the density of the bulk soil ( $\text{kg m}^{-3}$ ), respectively,  $\lambda_s$  is the thermal conductivity of soil ( $\text{W m}^{-1} \text{K}^{-1}$ ),  $l_f$  and  $l$  are the latent heat of fusion and sublimation ( $\text{J kg}^{-1}$ ), respectively,  $\eta_w$  is the volumetric soil water content ( $\text{m}^3 \text{m}^{-3}$ ),  $D_w$  is the soil water diffusivity ( $\text{m}^2 \text{s}^{-1}$ ),  $K$  is the unsaturated hydraulic conductivity ( $\text{m s}^{-1}$ ),  $E_b$  is the evaporation or condensation or sublimation of soil water ( $\text{kg m}^{-2} \text{s}^{-1}$ ), and  $E_{mel}$  is the melting or freezing rate in soil ( $\text{kg m}^{-3} \text{s}^{-1}$ ). The soil water diffusivity  $D_w$  ( $\text{m}^2 \text{s}^{-1}$ ) is expressed by:

$$86 \quad D_w = K \frac{\partial \psi}{\partial \eta_w}, \quad (14)$$

where  $\psi$  is the water potential in the soil layer (m).  $\psi$  and  $K$  ( $\text{m s}^{-1}$ ) in frozen soil are modeled based on the concept of freezing point depression (Zhang, Sun, & Xue, 2007):

$$\psi = \psi_{unfrozen}(1 + C_k\eta_i)^2, \quad (15)$$

$$K = K_{unfrozen}10^{-E_i\eta_i}, \quad (16)$$

where  $C_k$  and  $E_i$  are the empirical parameters, and  $\psi_{unfrozen}$  and  $K_{unfrozen}$  are the  $\psi$  and  $K$  in unfrozen soil described by Katata (2009), respectively.

Ice content at each soil layer  $\eta_i$  ( $\text{m}^3 \text{m}^{-3}$ ) is determined similar to snow ice content in Eq. (5) as:

$$\frac{\partial \eta_i}{\partial t} = -\frac{E_{mel}}{\rho_i}, \quad (17)$$

$$E_{mel} = \frac{C_s \rho_s}{l_f} \frac{T_s - T_m}{\partial t}, \quad (18)$$

where  $\rho_i$  is the density of ice ( $\text{kg m}^{-3}$ ).

## References

- Ammann C., Flechard C., Leifeld J., Neftel A., Fuhrer J. (2007). The carbon budget of newly established temperate grassland depends on management intensity. *Agriculture, Ecosystems & Environment*, 121, 5-20.
- Arora V.K., Boer G.J. (2003). A representation of variable root distribution in dynamic vegetation models. *Earth Interactions*, 7, 1-19.
- Arora V.K., Boer G.J. (2005). A parameterization of leaf phenology for the terrestrial ecosystem

106 component of climate models. *Global Change Biology*, 11, 39-59.

107 Boone A. (2002). Description du schema de neige ISBA-ES (Explicit Snow). Centre National  
 108 de Recherches Météorologiques, Météo-France, Toulouse. Available from:  
 109 <http://www.cnrm.meteo.fr/IMG/pdf/snowdoc.pdf>.

110 Essery R., Morin S., Lejeune Y., Menard C. (2013). A comparison of 1701 snow models using  
 111 observations from an alpine site. *Advances in Water Resources*, 55, 131-148.

112 Hirashima H., Yamaguchi S., Sati A., Lehning M. (2010). Numerical modeling of liquid water  
 113 movement through layered snow based on new measurements of the water retention  
 114 curve. *Cold Regions Science and Technology*, 64(2), 94-103.

115 Höglind M., Hanslin H.M., Mortensen L.M. (2011). Photosynthesis of *Lolium perenne* L. at  
 116 low temperatures under low irradiances. *Environmental and Experimental Botany*,  
 117 70(2-3), 297-304.

118 Höglind M., Van Oijen M., Cameron D., Persson T. (2016). Process-based simulation of growth  
 119 and overwintering of grassland using the BASGRA model. *Ecological Modelling*, 335,  
 120 1-15.

121 Jordan R. (1991). A one-dimensional temperature model for a snow cover. Technical  
 122 documentation for SNTHERM.89. CRREL Special Report 91-16; US Army Core of  
 123 Engineers Cold Regions Research and Engineering Laboratory, Hanover, NH, 48 pp.

124 Katata G. (2009). Improvement of a land surface model for accurate prediction of surface  
 125 energy and water balances. JAEA-Data/Code 2008-033, JAEA, Japan, 64 pp.

126 Katata G., Kajino M., Matsuda K., Takahashi A., Nakaya K. (2014). A numerical study of the  
 127 effects of aerosol hygroscopic properties to dry deposition on a broad-leaved forest.  
 128 *Atmospheric Environment*, 97, 501-510.

129 Katata G., Ota M. (2017). A terrestrial ecosystem model (SOLVEG) coupled with atmospheric  
 130 gas and aerosol exchange processes. JAEA-Data/Code 2016-014, JAEA, Japan, 35 pp.

131 Monteith J.L. (1981). Evaporation and Surface-Temperature. *Quarterly Journal of the Royal*  
 132 *Meteorological Society*, 107(451), 1-27.

133 Nagai H. (2004). Atmosphere-soil-vegetation model including CO<sub>2</sub> exchange processes:  
 134 SOLVEG2, JAERI-Data/Code 2004-014, JAEA, 92 pp.

135 Oleson K.W., Lawrence D.M., Bonan G.B., Flanner M.G., Kluzek E., Lawrence P.J., Levis S.,  
 136 Swenson S.C., Thornton P.E. (2010). Technical description of version 4.0 of the  
 137 Community Land Model (CLM), NCAR Technical Note NCAR/TN-461+STR,  
 138 National Center for Atmospheric Research (NCAR), Boulder, CO, 257 pp.

139 Ota M., Nagai H., Koarashi J. (2013). Root and dissolved organic carbon controls on subsurface  
 140 soil carbon dynamics: A model approach. *Journal of Geophysical Research*, 118(4),  
 141 1646-1659.

142 Schapendonk A.H.M.C., Stol W., van Kraalingen D.W.G, Bouman B.A.M. (1998). LINGRA –  
 143 a source/sink model to simulate grassland productivity in Europe. *European Journal of*  
 144 *Agronomy*, 9(2-3), 87-100.

145 Thornley J.H.M., France J. (2007). Mathematical models in agriculture. *Quantitative Methods*  
 146 *for the Plant, Animal and Ecological Sciences*. 2nd Edition. Wallingford, CABI, 928 pp.



147 Van Oijen M., Höglind M., Hanslin M.H., Caldwell N. (2005). Process-based modeling of  
 148 timothy regrowth. *Agronomy Journal*, 97(5), 1295–1303.

149 Wiscombe W.J., Warren S.G. (1980). A model for the spectral albedo of snow. I: pure snow,  
 150 *Journal of Atmospheric Science*. 37, 2712-2733.

151 Yamazaki T. (2001). A one-dimensional land surface model adaptable to intensely cold regions  
 152 and its applications in eastern Siberia. *Journal of the Meteorological Society of Japan*,  
 153 79(6), 1107-1118.

154 Zhang X., Sun S., Xue Y. (2007). Development and testing of a frozen soil parameterization for  
 155 cold region studies. *Journal of Hydrometeorology*, 8, 690-701.

156
